# Supplementary material for: A T cell receptor targeting a recurrent driver mutation in FLT3 mediates elimination of primary human acute myeloid leukemia in vivo
Source: PubMed Central journal article supplement (PMC10597840; doi:10.1038/s43018-023-00642-8), 2023-10-02
Supplement: 43018_2023_642_MOESM1_ESM.pdf [file 43018_2023_642_MOESM1_ESM.pdf]

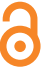

---

# **A T cell receptor targeting a recurrent driver mutation in FLT3 mediates elimination of primary human acute myeloid leukemia in vivo**

---

In the format provided by the authors and unedited

**Supplementary Table S1: List of candidate off-target peptides reactive to TCR<sup>FLT3D/Y</sup> cells**

| Peptide Number | Peptide Sequence | Gene Name     | Full Name                                                                    |
|----------------|------------------|---------------|------------------------------------------------------------------------------|
| 1              | TMINDSDYV        | <i>ABCA5</i>  | Cholesterol transporter ABCA5                                                |
| 2              | FLKNDMIYA        | <i>AP5M1</i>  | AP-5 complex subunit mu-1                                                    |
| 3              | SLISDSAYV        | <i>ASCC3</i>  | Activating signal cointegrator 1 complex subunit 3                           |
| 4              | YTGTDTQYV        | <i>CADH9</i>  | Cadherin-9                                                                   |
| 5              | ITINDVVYV        | <i>DHX9</i>   | ATP-dependent RNA helicase A                                                 |
| 6              | STQTDIFYT        | <i>DLG5</i>   | Disks large homolog 5                                                        |
| 7              | GVGTDTNYV        | <i>DLGP4</i>  | Disks large-associated protein 4 (DAP-4)                                     |
| 8              | AMMCDIIYA        | <i>ECHM</i>   | Enoyl-CoA hydratase, mitochondrial (mECH)                                    |
| 9              | SINNDTTYC        | <i>LACB2</i>  | Endoribonuclease LACTB2                                                      |
| 10             | QIYTDIIYI        | <i>LFG3</i>   | Protein lifeguard 3                                                          |
| 11             | AVISDAMYI        | <i>LZTR1</i>  | Leucine-zipper-like transcriptional regulator 1                              |
| 12             | YITSDMFYV        | <i>MED1</i>   | Mediator of RNA polymerase II transcription subunit 1                        |
| 13             | FLSNDAAYT        | <i>MMP15</i>  | Matrix metalloproteinase-15                                                  |
| 14             | VLTSDMAYV        | <i>P3C2A</i>  | Phosphatidylinositol 4-phosphate 3-kinase C2 domain-containing subunit alpha |
| 15             | AVDNDSFYV        | <i>PRADC1</i> | Protease-associated domain-containing protein 1                              |
| 16             | FVSDSTYC         | <i>PASD1</i>  | Circadian clock protein PASD1                                                |
| 17             | SVSTDTIYA        | <i>PIGC</i>   | Phosphatidylinositol N-acetylglucosaminyltransferase subunit C               |
| 18             | MVQTDMQYV        | <i>PTPRA</i>  | Receptor-type tyrosine-protein phosphatase alpha                             |
| 19             | MVQTDMQYT        | <i>PTPRE</i>  | Receptor-type tyrosine-protein phosphatase epsilon                           |
| 20             | QTKSDSNYI        | <i>SETMR</i>  | Histone-lysine N-methyltransferase SETMAR                                    |
| 21             | HLRNDSHYV        | <i>SLC31</i>  | Neutral and basic amino acid transport protein rBAT                          |
| 22             | LTTSDIDYA        | <i>TAF6</i>   | Transcription initiation factor TFIID subunit 6                              |
| 23             | HVWTDTHYV        | <i>TFR2</i>   | Transferrin receptor protein 2                                               |
| 24             | ALSNDTVYV        | <i>THSD1</i>  | Thrombospondin type-1 domain-containing protein 1                            |
| 25             | LTCTDCGYC        | <i>UBP2</i>   | Ubiquitin carboxyl-terminal hydrolase 2                                      |
| 26             | ALFTDTGYI        | <i>VPS16</i>  | Vacuolar protein sorting-associated protein 16 homolog                       |
| 27             | VTGTDSQYC        | <i>WDR62</i>  | WD repeat-containing protein                                                 |
| 28             | GLESDVAYA        | <i>ZCPW1</i>  | Zinc finger CW-type PWWP domain protein 1                                    |

**Supplementary Table S2: Clinical information for all leukemia patients included in the study**

| PT ID | Sex and (Age) | Classification | Cytogenetic Characteristics                                                       | TKD <sup>mut</sup> type | HLA*02:01 Status | Risk Stratification | Response to HSCT                         | Outcome   |
|-------|---------------|----------------|-----------------------------------------------------------------------------------|-------------------------|------------------|---------------------|------------------------------------------|-----------|
| PT. 1 | M (65)        | AML            | <i>FLT3</i> TKD<br><i>CBFbeta-MYH 11</i> fusion<br>inv(16)(p13;q22)               | D835Y                   | +                | High Risk           | Complete remission<br>Allo-HSCT          | Alive     |
| PT. 2 | M (20)        | AMML           | <i>FLT3</i> TKD                                                                   | D835Y                   | +                | High Risk           | Complete remission<br>Allo-HSCT          | Alive     |
| PT. 3 | F (45)        | AML            | <i>FLT3</i> TKD<br><i>NPM1</i> mutation                                           | D835Y                   | +                | Low Risk            | Complete remission<br>Auto-HSCT          | Alive     |
| PT. 4 | M (91)        | AML            | <i>FLT3</i> TKD                                                                   | D835Y                   | +                | Intermediate        | No treatment                             | Dead      |
| PT. 5 | M (56)        | APL            | <i>FLT3</i> TKD, <i>FLT3</i> -ITD, <i>NRAS</i>                                    | D835Y                   | +                | Low Risk            | Complete remission<br>Not transplanted   | Alive     |
| PT. 6 | F (72)        | AML            | <i>FLT3</i> TKD, <i>NPM1</i> mutation,<br><i>IDH1</i> , <i>DNMT3A</i>             | D835Y                   | +                | Intermediate        | Palliative treatment with<br>hydroxyurea | Dead      |
| PT. 7 | M (61)        | AML            | <i>FLT3</i> ITD, <i>FLT3</i> TKD, <i>NPM1</i> ,<br>Trisomy 8, Trisomy 14, del(6q) | D835Y                   | +                | Intermediate        | Residual AML<br>Allo-HSCT                | Not known |
| PT. 8 | F (72)        | AMML           | <i>FLT3</i> TKD, <i>DNMT3A</i> , <i>NPM1</i>                                      | D835Y                   | -                | Low Risk            | Residual AML                             | Dead      |
| PT. 9 | F (44)        | AML            | <i>FLT3</i> TKD<br><i>NPM1</i> mutation                                           | D835E                   | +                | High Risk           | Residual AML<br>Allo-HSCT                | Dead      |
| PT.10 | F (33)        | AMML           | <i>FLT3</i> TKD<br><i>CBFbeta-MYH 11</i><br>fusion inv(16)(p13;q22)               | D835H                   | +                | Low Risk            | Complete remission<br>Not transplanted   | Alive     |
| PT.11 | M (57)        | AML            | Trisomy 8 and <i>NPM1</i> mutation                                                | -                       | +                | Low Risk            | Complete remission<br>Allo-HSCT          | Alive     |

**Supplementary Table S3: Sequencing data for all FLT3<sup>D/Y</sup> positive leukemia patients**

| PT. ID | Chr                | Gene                                                                    | Type                                                                                | Transcript Variant                                                                                                                                                                                                                                                         | Protein Variant                                                                        | VAF(%)                       |
|--------|--------------------|-------------------------------------------------------------------------|-------------------------------------------------------------------------------------|----------------------------------------------------------------------------------------------------------------------------------------------------------------------------------------------------------------------------------------------------------------------------|----------------------------------------------------------------------------------------|------------------------------|
| Pt. 1  | 13                 | <i>FLT3</i>                                                             | missense/snv                                                                        | c.2503G>T                                                                                                                                                                                                                                                                  | p.D835Y                                                                                | 45,84                        |
| Pt. 2  | 13                 | <i>FLT3</i>                                                             | missense/snv                                                                        | c.2503G>T                                                                                                                                                                                                                                                                  | p.D835Y                                                                                | 47,14                        |
| Pt. 3  | 2<br>5             | <i>DNMT3A</i><br><i>NPM1</i>                                            | missense/snv<br>frameshift/insertion                                                | c.2645G>A; n.3075G>A; c.2189G>A; c.2078G>A<br>c.773_776dupTCTG; n.977_980dupTCTG;<br>c.860_863dupTCTG; c.479_482dupTCTG;                                                                                                                                                   | p.R693H; p.R882H; p.R730H<br>p.W161fs*?; p.W259fs*?; p.W288fs*?;                       | 41,8<br>53,3                 |
|        | 10<br>13           | <i>SMC3</i><br><i>FLT3</i>                                              | missense/snv<br>missense/snv                                                        | c.668_671dupTCTG c.1142G>T n.2701G>T;<br>c.2503G>T                                                                                                                                                                                                                         | p.W224fs*? p.R381L<br>p.D835Y                                                          | 30,4<br>38,9                 |
| Pt. 4  | 8<br>13<br>17      | <i>RAD21</i><br><i>FLT3 MFSD11</i> ;<br><i>MIR636</i> ;<br><i>SRSF2</i> | frameshift/deletion<br>missense/snv<br>missense/snv                                 | c.355delA; c.1720delA; c.232delA; c.34delA<br>n.2701G>T; c.2503G>T<br>c.-1193G>C; n.-329C>G; c.-281G>C; c.-1078G>C;<br>c.-817G>C; n.-624G>C; c.-286G>C; c.-1476G>C;<br>c.-1360G>C; c.-1171G>C; n.313G>C;<br>n.455C>G; c.284C>G<br>c.493G>T; c.412G>T<br>c.422C>A; c.341C>A | p.T119fs*38; p.T78fs*38; p.T12fs*38; p.T574fs*38<br>p.D835Y<br>p.P95R                  | 42,5<br>27,8<br>45,5         |
|        | 21<br>21<br>X<br>X | <i>RUNX1</i><br><i>RUNX1</i><br><i>BCOR</i><br><i>BCORL1</i>            | missense/snv stop gain/snv<br>frameshift/insertion stop<br>gain/snv<br>missense/snv | c.2811dupC<br>c.2350C>T                                                                                                                                                                                                                                                    | p.G165C; p.G138C<br>p.S141*; p.S114*<br>p.T938fs*8<br>p.R784*                          | 44,1<br>43,8<br>80,6<br>84,2 |
|        | 7<br>13            | <i>CUX1</i><br><i>FLT3</i>                                              | missense/snv<br>missense/snv                                                        | c.2503G>T                                                                                                                                                                                                                                                                  | p.D835Y                                                                                | 48,5<br>25,98                |
|        | 2<br>2<br>5        | <i>DNMT3A</i><br><i>IDH1</i><br><i>NPM1</i>                             | missense/snv<br>missense/snv<br>frameshift/insertion                                | n.3074C>T; c.2644C>T; c.2077C>T; c.2188C>T<br>c.395G>A<br>c.776_777insCCTG; c.863_864insCCTG;<br>n.980_981insCCTG; c.482_483insCCTG;<br>c.671_672insCCTG<br>c.2503G>T                                                                                                      | p.R693C; p.R882C; p.R730C<br>p.R132H<br>p.W161fs*?; p.W259fs*?; p.W288fs*?; p.W224fs*? | 48,3<br>47,2<br>43,5         |
|        | 13                 | <i>FLT3</i>                                                             | missense/snv                                                                        |                                                                                                                                                                                                                                                                            | p.D835Y                                                                                | 46,2                         |
| Pt. 7  | 13<br>13           | <i>FLT3</i><br><i>FLT3</i>                                              | missense/snv<br>frameshift/insertion                                                | c.2503C>A<br>28608259 sequence<br>AGCCAGCTACAGATGGTACAGGTGACCGGCTCCTCAGATAATGAGTA<br>CTCC                                                                                                                                                                                  | p.D835Y                                                                                | 43                           |
|        | 5                  | <i>NPM1</i>                                                             | frameshift/insertion                                                                | c.859_860insTCTG                                                                                                                                                                                                                                                           | p.W288fs*>9                                                                            | 38,1                         |
| Pt. 8  | 2                  | <i>DNMT3A</i>                                                           | frameshift/deletion                                                                 | c.1521delC                                                                                                                                                                                                                                                                 | p.L508fs                                                                               | 29                           |
|        | 5                  | <i>NPM1</i>                                                             | frameshift/insertion                                                                | c.858insTCTG                                                                                                                                                                                                                                                               | p.L287fs                                                                               | 30                           |
|        | 13                 | <i>FLT3</i>                                                             | missense/snv                                                                        | c.2503C>A                                                                                                                                                                                                                                                                  | p.D835Y                                                                                | 44                           |

**Supplementary Table S4: Number of events recorded by flow cytometry in PB, BM and spleen at terminal analysis for PDX models**

| PDX model patient 7 |                        |              |              |              |              |
|---------------------|------------------------|--------------|--------------|--------------|--------------|
| Mouse ID            | Treatment              | BM           |              | Spleen       |              |
|                     |                        | Total events | CD33+ events | Total events | CD33+ events |
| 1                   | TCR <sup>1G4</sup>     | 23069        | 20344        | 53485        | 3193         |
| 3                   | TCR <sup>1G4</sup>     | 94332        | 90434        | 52402        | 5434         |
| 7                   | TCR <sup>1G4</sup>     | 89313        | 83333        | 54036        | 6720         |
| 8                   | TCR <sup>1G4</sup>     | 33993        | 21127        | 60046        | 3923         |
| 10                  | TCR <sup>1G4</sup>     | 88895        | 87634        | 46640        | 10104        |
| 12                  | TCR <sup>1G4</sup>     | 24153        | 21654        | 48277        | 2953         |
| 2                   | TCR <sup>FLT3D/Y</sup> | 62264        | 26           | 109031       | 3            |
| 4                   | TCR <sup>FLT3D/Y</sup> | 39702        | 151          | 95415        | 40           |
| 5                   | TCR <sup>FLT3D/Y</sup> | 45769        | 309          | 81054        | 8            |
| 6                   | TCR <sup>FLT3D/Y</sup> | 41736        | 445          | 121855       | 23           |
| 9                   | TCR <sup>FLT3D/Y</sup> | 21850        | 199          | 93328        | 20           |
| 11                  | TCR <sup>FLT3D/Y</sup> | 47639        | 12           | 77626        | 5            |
| 13                  | TCR <sup>FLT3D/Y</sup> | 13048        | 53           | 78465        | 6            |

**Supplementary Table S5: ddPCR analysis of the FLT3 D835Y mutation in BM from mice - PDX model with AML patient 7**

| Mouse ID | Population | Treatment              | Number of cells | %VAF | 95% CI |      | % CD33+ cells |
|----------|------------|------------------------|-----------------|------|--------|------|---------------|
|          |            |                        |                 |      | Min    | Max  |               |
| 1        | CD45+CD3-  | TCR <sup>1G4</sup>     | 2000            | 99.8 | 99.7   | 99.9 | 99.1          |
| 3        | CD45+CD3-  | TCR <sup>1G4</sup>     | 2000            | 99.4 | 99.2   | 99.7 | 99.6          |
| 7        | CD45+CD3-  | TCR <sup>1G4</sup>     | 2000            | 99.9 | 99.7   | 100  | 99.6          |
| 8        | CD45+CD3-  | TCR <sup>1G4</sup>     | 2000            | 99   | 98.8   | 99.3 | 99.6          |
| 10       | CD45+CD3-  | TCR <sup>1G4</sup>     | 2000            | 99.8 | 99.7   | 99.9 | 99.5          |
| 12       | CD45+CD3-  | TCR <sup>1G4</sup>     | 2000            | 99.1 | 98.9   | 99.3 | 99.1          |
| 2        | CD45+CD3-  | TCR <sup>FLT3D/Y</sup> | 251             | 5.2  | 4.6    | 5.8  | 8.6           |
| 4        | CD45+CD3-  | TCR <sup>FLT3D/Y</sup> | 150             | 42.8 | 40.4   | 45.2 | 53            |
| 5        | CD45+CD3-  | TCR <sup>FLT3D/Y</sup> | 300             | 68.5 | 67.4   | 69.6 | 60.5          |
| 6        | CD45+CD3-  | TCR <sup>FLT3D/Y</sup> | 568             | 59.8 | 58.4   | 61.3 | 64.6          |
| 9        | CD45+CD3-  | TCR <sup>FLT3D/Y</sup> | 281             | 39.9 | 38.7   | 41.2 | 46.3          |
| 11       | CD45+CD3-  | TCR <sup>FLT3D/Y</sup> | 268             | 4.8  | 4.3    | 5.3  | 6             |
| 13       | CD45+CD3-  | TCR <sup>FLT3D/Y</sup> | 218             | 29.9 | 28.3   | 31.5 | 21.6          |

Calculations for Main Fig 3E: ((fraction of hCD45+CD3- cells) x (VAF/100) x cellularity in BM)  
Determined by FACS, ddPCR and sysmex count respectively.

**Supplementary Table S6: Number of events recorded by flow cytometry in PB, BM and spleen at terminal analysis for PDX models**

| Mouse ID | Treatment                        | PDX model patient 1 |              |                   |                   |              |              |                   |                   |              |              |                   |                   |
|----------|----------------------------------|---------------------|--------------|-------------------|-------------------|--------------|--------------|-------------------|-------------------|--------------|--------------|-------------------|-------------------|
|          |                                  | PB                  |              |                   |                   | BM           |              |                   |                   | Spleen       |              |                   |                   |
|          |                                  | Total events        | CD33+ events | CD33+CD34- events | CD33+CD34+ events | Total events | CD33+ events | CD33+CD34- events | CD33+CD34+ events | Total events | CD33+ events | CD33+CD34- events | CD33+CD34+ events |
| 14       | TCR <sup>IG4</sup>               | 20387               | 915          | 831               | 84                | 81114        | 22366        | 17649             | 4717              | 42390        | 1400         | 1158              | 242               |
| 15       | TCR <sup>IG4</sup>               | 25398               | 1087         | 982               | 105               | 52782        | 15358        | 12775             | 2583              | 55286        | 1085         | 831               | 254               |
| 16       | TCR <sup>IG4</sup>               | 16848               | 2496         | 2269              | 227               | 91754        | 29039        | 24188             | 4851              | 58426        | 1283         | 1096              | 187               |
| 17       | TCR <sup>IG4</sup>               | 63157               | 191          | 180               | 11                | 85490        | 5629         | 4385              | 1244              | 76297        | 230          | 210               | 20                |
| 18       | TCR <sup>FL<sup>T3D</sup>Y</sup> | 13802               | 150          | 149               | 1                 | 253829       | 2286         | 2273              | 13                | 64374        | 566          | 563               | 3                 |
| 19       | TCR <sup>FL<sup>T3D</sup>Y</sup> | <b>19237</b>        | 327          | 327               | 0                 | 220258       | 4687         | 4680              | 7                 | 87812        | 778          | 776               | 2                 |
| 20       | TCR <sup>FL<sup>T3D</sup>Y</sup> | 8943                | 347          | 347               | 0                 | 165092       | 3737         | 3733              | 4                 | 36631        | 394          | 394               | 0                 |
| 21       | TCR <sup>FL<sup>T3D</sup>Y</sup> | 16968               | 180          | 180               | 0                 | 150235       | 2057         | 2049              | 8                 | 36047        | 266          | 264               | 2                 |

## Supplementary Table S7: Somatic mutations in AML patient 1 BM blasts identified by whole exome sequencing

| Mutations detected in patient 1 BM blasts  | Detected in sample (YES/NO) |                                      |                      |
|--------------------------------------------|-----------------------------|--------------------------------------|----------------------|
|                                            | Untreated PDX mouse         | TCR <sup>1G4</sup> treated PDX mouse | Patient 1 BM T cells |
| FLT3:NM_004119:exon20:c.G2503T:p.D835Y     | YES                         | YES                                  | NO                   |
| WT1:NM_024426:exon10:c.A1520C:p.H507P      | YES                         | YES                                  | NO                   |
| BSN:NM_003458:exon6:c.G10595C:p.C3532S     | YES                         | YES                                  | NO                   |
| ADAMTSL4:NM_019032:exon11:c.C1825A:p.P609T | YES                         | YES                                  | NO                   |
| NOL4:NM_001353236:exon6:c.A870G:p.X290W    | YES                         | YES                                  | NO                   |
| FBXW12:NM_001159927:exon8:c.G869A:p.G290E  | YES                         | YES                                  | NO                   |
| TPH2:NM_173353:exon4:c.540+2T>G            | YES                         | YES                                  | NO                   |
| ZNF646:NM_014699:exon2:c.G5192A:p.R1731H   | YES                         | YES                                  | NO                   |
| ITGA2B:NM_000419:exon5:c.G608C:p.S203T     | YES                         | YES                                  | NO                   |
| HTT:NM_002111:exon25:c.G3145A:p.V1049M     | YES                         | YES                                  | NO                   |
| TTC21A:NM_001105513:exon2:c.C137A:p.A46D   | YES                         | YES                                  | NO                   |
| LPA:NM_005577:exon39:c.A5968T:p.S1990C     | YES                         | YES                                  | NO                   |
| SCN9A:NM_001365536:exon12:c.G1951T:p.D651Y | YES                         | YES                                  | NO                   |
| ANHX:NM_001191054:exon7:c.C901G:p.L301V    | YES                         | YES                                  | NO                   |
| NWD1:NM_001007525:exon5:c.C361T:p.L121L    | YES                         | YES                                  | NO                   |
| SDR16C5:NM_001318050:exon6:c.C722G:p.T241R | YES                         | YES                                  | NO                   |
| HAVCR2:NM_032782:exon7:c.C775T:p.R259C     | YES                         | YES                                  | NO                   |
| ZNF266:NM_001370390:exon8:c.G305A:p.S102N  | YES                         | YES                                  | NO                   |
| CCNJL:NM_001308173:exon6:c.C875T:p.A292V   | YES                         | YES                                  | NO                   |
| BTBD7:NM_001289133:exon5:c.A644G:p.N215S   | YES                         | YES                                  | NO                   |
| WNK2:NM_006648:exon22:c.C5646T:p.S1882S    | YES                         | YES                                  | NO                   |
| LTBR:NM_002342:exon1:c.A19C:p.T7P          | YES                         | YES                                  | NO                   |
| ARIH2:NM_001317334:exon5:c.C179A:p.P60H    | YES                         | YES                                  | NO                   |



## Supplementary Table S8: ddPCR analysis of FLT3 D835Y and WT1 H507P mutations in BM from AML patient 1 and in transplanted PDX mice

| ID                          | Population | Treatment | Number of cells | FLT3 D835Y |         |      | WT1 H507P |         |       |
|-----------------------------|------------|-----------|-----------------|------------|---------|------|-----------|---------|-------|
|                             |            |           |                 | %VAF       | 95 % CI |      | %VAF      | 95 % CI |       |
|                             |            |           |                 | Min        | Max     |      | Min       | Max     |       |
| Primary patient 1 BM blasts | CD3-CD19-  | N/A       | 933 991         | 46,1       | 45,2    | 47,0 | 45,54     | 44,69   | 46,39 |
| Mouse 14                    | CD33+CD34- | 1G4       | 1000            | 43,3       | 42,0    | 44,7 | 42,3      | 41,3    | 43,3  |
|                             | CD33+CD34+ |           | 1000            | 47,9       | 46,7    | 49,0 | 50,9      | 49,8    | 51,9  |
|                             | CD19+      |           | 1000            | 0,4        | 0,2     | 0,5  | 0,4       | 0,3     | 0,5   |
| Mouse 15                    | CD33+CD34- | 1G4       | 1000            | 38,7       | 37,4    | 39,9 | 39,9      | 39,0    | 40,8  |
|                             | CD33+CD34+ |           | 1000            | 49,2       | 48,0    | 50,5 | 51,1      | 50,2    | 52,0  |
|                             | CD19+      |           | 1000            | 0,0        | 0,0     | 0,0  | N/A       | N/A     | N/A   |
| Mouse 16                    | CD33+CD34- | 1G4       | 1000            | 42,0       | 40,7    | 43,2 | 42,8      | 41,8    | 43,8  |
|                             | CD33+CD34+ |           | 1000            | 49,8       | 48,4    | 51,1 | 50,0      | 49,0    | 50,9  |
|                             | CD19+      |           | 1000            | 0,0        | 0,0     | 0,0  | N/A       | N/A     | N/A   |
| Mouse 17                    | CD33+CD34- | 1G4       | 1000            | 42,8       | 41,5    | 44,2 | 42,4      | 41,4    | 43,3  |
|                             | CD33+CD34+ |           | 1000            | 50,7       | 49,4    | 52,1 | 50,2      | 49,2    | 51,2  |
|                             | CD19+ *    |           | 10              | 0,0        | 0,0     | 0,1  | N/A       | N/A     | N/A   |
| Mouse 18                    | CD33+CD34- | FLT3 D/Y  | 1000            | 0,4        | 0,2     | 0,5  | 0,4       | 0,3     | 0,5   |
|                             | CD19+      |           | 500             | 0,0        | 0,0     | 0,0  | N/A       | N/A     | N/A   |
| Mouse 19                    | CD33+CD34- | FLT3 D/Y  | 1000            | 0,2        | 0,1     | 0,3  | 0,4       | 0,3     | 0,5   |
|                             | CD19+      |           | 1000            | 0,0        | 0,0     | 0,1  | N/A       | N/A     | N/A   |
| Mouse 20                    | CD33+CD34- | FLT3 D/Y  | 1000            | 0,8        | 0,6     | 1,1  | 0,3       | 0,2     | 0,4   |
|                             | CD19+      |           | 659             | 0,0        | 0,0     | 0,0  | N/A       | N/A     | N/A   |
| Mouse 21                    | CD33+CD34- | FLT3 D/Y  | 1000            | 0,5        | 0,3     | 0,6  | 0,3       | 0,2     | 0,3   |
|                             | CD19+      |           | 90              | 0,0        | 0,0     | 0,0  | N/A       | N/A     | N/A   |

Calculations for Main Fig 4E: ((fraction of hCD45+CD33+CD34+/- cells) x (VAF/100) x cellularity in BM) Determined by FACS, ddPCR and sysmex count respectively.  
 \*insufficient cells for quantification

**Supplementary Table S9: Number of events recorded by flow cytometry in PB, BM and spleen at terminal analysis for PDX models**

| PDX model patient 1 MRD |                        |              |              |
|-------------------------|------------------------|--------------|--------------|
| Mouse ID                | Treatment              | BM           |              |
|                         |                        | Total events | CD33+ events |
| 23                      | TCR <sup>1G4</sup>     | 287927       | 495          |
| 25                      | TCR <sup>1G4</sup>     | 195571       | 160          |
| 27                      | TCR <sup>1G4</sup>     | 245213       | 266          |
| 30                      | TCR <sup>1G4</sup>     | 251089       | 105          |
| 22                      | TCR <sup>FLT3D/Y</sup> | 250777       | 4            |
| 24                      | TCR <sup>FLT3D/Y</sup> | 301753       | 1            |
| 26                      | TCR <sup>FLT3D/Y</sup> | 247626       | 0            |
| 28                      | TCR <sup>FLT3D/Y</sup> | 4246         | 0            |

# Supplementary Table S10: Complete list of all antibodies used in the study

| Antibody List                                              |                              |                     |                   |                          |                        |                           |                |                                           |                                                                                                                                                                                                                                                                                                                                                                                                        |
|------------------------------------------------------------|------------------------------|---------------------|-------------------|--------------------------|------------------------|---------------------------|----------------|-------------------------------------------|--------------------------------------------------------------------------------------------------------------------------------------------------------------------------------------------------------------------------------------------------------------------------------------------------------------------------------------------------------------------------------------------------------|
| CD number/protein target/dye/kit                           | Fluorochrome                 | Clone name          | Species           | Supplier                 | Catalogue number       | Dilution factor           | Application    | Lot                                       | Validation                                                                                                                                                                                                                                                                                                                                                                                             |
| CD3                                                        | PerCP-Cy5.5, APC-Cy7, BB515, | SK7, UCH-T1, HIT3a  | Mouse, anti-human | Biologend, Biologend, BD | 344808, 300426, 565100 | 1:200, 1:200, 1:100-1:200 | Flow cytometry | (BB515) 715825/ 9021562/ 9205788/ 0077790 | <a href="https://www.biologend.com/ja-ip/quality/quality-control">https://www.biologend.com/ja-ip/quality/quality-control</a><br><a href="https://www.bdbiosciences.com/en-us/products/reagents/flow-cytometry-reagents/research-reagents/quality-and-reproducibility">https://www.bdbiosciences.com/en-us/products/reagents/flow-cytometry-reagents/research-reagents/quality-and-reproducibility</a> |
| CD4                                                        | BUV395, PE-Cy5, BV711        | RPA-T4, OKT4        | Mouse, anti-human | BD, Biologend, Biologend | 564724, 300512, 317440 | 1:300, 1:300, 1:200       | Flow cytometry | (BUV395) 35962, (PE-Cy7) B269744/ B268879 | <a href="https://www.bdbiosciences.com/en-us/products/reagents/flow-cytometry-reagents/research-reagents/quality-and-reproducibility">https://www.bdbiosciences.com/en-us/products/reagents/flow-cytometry-reagents/research-reagents/quality-and-reproducibility</a><br><a href="https://www.biologend.com/ja-ip/quality/quality-control">https://www.biologend.com/ja-ip/quality/quality-control</a> |
| CD8a                                                       | AF700, BV421, APC-Cy7        | HIT8a, RPA-T8       | Mouse, anti-human | Biologend                | 300920, 301036, 301016 | 1:200, 1:200, 1:80-1:300  | Flow cytometry | (APC-Cy7) B274260/ B300873                | <a href="https://www.biologend.com/ja-ip/quality/quality-control">https://www.biologend.com/ja-ip/quality/quality-control</a>                                                                                                                                                                                                                                                                          |
| CD11b                                                      | FITC                         | ICRF44              | Mouse, anti-human | Biologend                | 301330                 | 1:200                     | Flow cytometry |                                           | <a href="https://www.biologend.com/ja-ip/quality/quality-control">https://www.biologend.com/ja-ip/quality/quality-control</a>                                                                                                                                                                                                                                                                          |
| CD13                                                       | BV711                        | WM15                | Mouse, anti-human | Biologend                | 301722                 | 1:200                     | Flow cytometry |                                           | <a href="https://www.biologend.com/ja-ip/quality/quality-control">https://www.biologend.com/ja-ip/quality/quality-control</a>                                                                                                                                                                                                                                                                          |
| CD14                                                       | FITC, BV711, PE-Cy7          | HCD14, MSE2         | Mouse, anti-human | Biologend                | 325604, 301838, 301820 | 1:200                     | Flow cytometry |                                           | <a href="https://www.biologend.com/ja-ip/quality/quality-control">https://www.biologend.com/ja-ip/quality/quality-control</a>                                                                                                                                                                                                                                                                          |
| CD16                                                       | FITC                         | 3G8, NKP15          | Mouse, anti-human | Biologend, BD            | 302006, 335035         | 1:200, 1:100              | Flow cytometry |                                           | <a href="https://www.biologend.com/ja-ip/quality/quality-control">https://www.biologend.com/ja-ip/quality/quality-control</a><br><a href="https://www.bdbiosciences.com/en-us/products/reagents/flow-cytometry-reagents/research-reagents/quality-and-reproducibility">https://www.bdbiosciences.com/en-us/products/reagents/flow-cytometry-reagents/research-reagents/quality-and-reproducibility</a> |
| CD19                                                       | BV785, BV421, FITC           | HIB19, SJ25c1, 4G7, | Mouse, anti-human | Biologend, Biologend, BD | 302240, 363018, 345776 | 1:200, 1:200-1:300, 1:100 | Flow cytometry | (BV421) B237452/BS313190                  | <a href="https://www.biologend.com/ja-ip/quality/quality-control">https://www.biologend.com/ja-ip/quality/quality-control</a><br><a href="https://www.bdbiosciences.com/en-us/products/reagents/flow-cytometry-reagents/research-reagents/quality-and-reproducibility">https://www.bdbiosciences.com/en-us/products/reagents/flow-cytometry-reagents/research-reagents/quality-and-reproducibility</a> |
| CD20                                                       | BV785                        | 2H7                 | Mouse, anti-human | Biologend                | 302356                 | 1:200                     | Flow cytometry |                                           | <a href="https://www.biologend.com/ja-ip/quality/quality-control">https://www.biologend.com/ja-ip/quality/quality-control</a>                                                                                                                                                                                                                                                                          |
| CD33                                                       | APC-Cy7, BV785               | PE7.6, VM-53        | Mouse, anti-human | Biologend                | 366614, 303428         | 1:200                     | Flow cytometry | (BV785) B252894/ B260381/ B297609         | <a href="https://www.biologend.com/ja-ip/quality/quality-control">https://www.biologend.com/ja-ip/quality/quality-control</a>                                                                                                                                                                                                                                                                          |
| CD34                                                       | BV785, AF647, APC            | 561, 581, 8G12      | Mouse, anti-human | Biologend, Biologend, BD | 343626, 343508, 345804 | 1:200                     | Flow cytometry | (APC) 7348707                             | <a href="https://www.biologend.com/ja-ip/quality/quality-control">https://www.biologend.com/ja-ip/quality/quality-control</a><br><a href="https://www.bdbiosciences.com/en-us/products/reagents/flow-cytometry-reagents/research-reagents/quality-and-reproducibility">https://www.bdbiosciences.com/en-us/products/reagents/flow-cytometry-reagents/research-reagents/quality-and-reproducibility</a> |
| CD38                                                       | PE-Cy7                       | HB-7                | Mouse, anti-human | Biologend                | 356808                 | 1:200                     | Flow cytometry |                                           | <a href="https://www.biologend.com/ja-ip/quality/quality-control">https://www.biologend.com/ja-ip/quality/quality-control</a>                                                                                                                                                                                                                                                                          |
| CD45                                                       | BV605, AF700                 | H130                | Mouse, anti-human | Biologend                | 304042, 304024         | 1:200, 1:200-1:600        | Flow cytometry | (AF700) B284831/ B306873                  | <a href="https://www.biologend.com/ja-ip/quality/quality-control">https://www.biologend.com/ja-ip/quality/quality-control</a>                                                                                                                                                                                                                                                                          |
| CD45                                                       | BV510                        | 30-F11              | Rat, anti-mouse   | Biologend                | 103138                 | 1:400-1:800               | Flow cytometry | B251556/ B305756                          | <a href="https://www.biologend.com/ja-ip/quality/quality-control">https://www.biologend.com/ja-ip/quality/quality-control</a>                                                                                                                                                                                                                                                                          |
| CD45RA                                                     | PE                           | H1100               | Mouse, anti-human | BD                       | 555489                 | 1:100                     | Flow cytometry |                                           | <a href="https://www.bdbiosciences.com/en-us/products/reagents/flow-cytometry-reagents/research-reagents/quality-and-reproducibility">https://www.bdbiosciences.com/en-us/products/reagents/flow-cytometry-reagents/research-reagents/quality-and-reproducibility</a>                                                                                                                                  |
| CD45RO                                                     | APC                          | UCHL1               | Mouse, anti-human | BD                       | 340438                 | 1:100                     | Flow cytometry |                                           | <a href="https://www.bdbiosciences.com/en-us/products/reagents/flow-cytometry-reagents/research-reagents/quality-and-reproducibility">https://www.bdbiosciences.com/en-us/products/reagents/flow-cytometry-reagents/research-reagents/quality-and-reproducibility</a>                                                                                                                                  |
| CD56                                                       | BV650, ECD                   | NCAM, N901          | Mouse, anti-human | BD, Beckman Coulter      | 564057, A82943         | 1:200                     | Flow cytometry |                                           | <a href="https://www.bdbiosciences.com/en-us/products/reagents/flow-cytometry-reagents/research-reagents/quality-and-reproducibility">https://www.bdbiosciences.com/en-us/products/reagents/flow-cytometry-reagents/research-reagents/quality-and-reproducibility</a><br><a href="https://www.beckman.com/reagents/cookie">https://www.beckman.com/reagents/cookie</a>                                 |
| CD57                                                       | BV605                        | QA17A04             | Mouse, anti-human | Biologend                | 393303                 | 1:200                     | Flow cytometry |                                           | <a href="https://www.biologend.com/ja-ip/quality/quality-control">https://www.biologend.com/ja-ip/quality/quality-control</a>                                                                                                                                                                                                                                                                          |
| CD62L                                                      | PE-Cy7                       | DREG-56             | Mouse, anti-human | Biologend                | 304822                 | 1:200                     | Flow cytometry |                                           | <a href="https://www.biologend.com/ja-ip/quality/quality-control">https://www.biologend.com/ja-ip/quality/quality-control</a>                                                                                                                                                                                                                                                                          |
| CD123                                                      | BV605                        | 6H6                 | Mouse, anti-human | Biologend                | 306026                 | 1:200                     | Flow cytometry |                                           | <a href="https://www.biologend.com/ja-ip/quality/quality-control">https://www.biologend.com/ja-ip/quality/quality-control</a>                                                                                                                                                                                                                                                                          |
| CD135                                                      | PerCP-Cy5.5                  | BV10AH2             | Mouse, anti-human | Biologend                | 313316                 | 1:200                     | Flow cytometry |                                           | <a href="https://www.biologend.com/ja-ip/quality/quality-control">https://www.biologend.com/ja-ip/quality/quality-control</a>                                                                                                                                                                                                                                                                          |
| CD137                                                      | PE                           | 4B4-1               | Mouse, anti-human | BD                       | 555966                 | 1:20                      | Flow cytometry |                                           | <a href="https://www.bdbiosciences.com/en-us/products/reagents/flow-cytometry-reagents/research-reagents/quality-and-reproducibility">https://www.bdbiosciences.com/en-us/products/reagents/flow-cytometry-reagents/research-reagents/quality-and-reproducibility</a>                                                                                                                                  |
| CD197 (CCR7)                                               | FITC                         | G043H7              | Mouse, anti-human | BioLegend                | 353216                 | 1:100                     | Flow cytometry |                                           | <a href="https://www.biologend.com/ja-ip/quality/quality-control">https://www.biologend.com/ja-ip/quality/quality-control</a>                                                                                                                                                                                                                                                                          |
| HLA-A2                                                     | PE, BV650                    | BB7.2               | Mouse, anti-human | BioLegend                | 343306, 343324         | 1:200                     | Flow cytometry | (PE) B279657 (BV650) B290341              | <a href="https://www.biologend.com/ja-ip/quality/quality-control">https://www.biologend.com/ja-ip/quality/quality-control</a>                                                                                                                                                                                                                                                                          |
| HLA-DR                                                     | AF700                        | L243                | Mouse, anti-human | BioLegend                | 307626                 | 1:200                     | Flow cytometry |                                           | <a href="https://www.biologend.com/ja-ip/quality/quality-control">https://www.biologend.com/ja-ip/quality/quality-control</a>                                                                                                                                                                                                                                                                          |
| TCRβ                                                       | PE                           | H57-597             | Mouse, anti-human | BioLegend                | 109208                 | 1:200                     | Flow cytometry | B219253                                   | <a href="https://www.biologend.com/ja-ip/quality/quality-control">https://www.biologend.com/ja-ip/quality/quality-control</a>                                                                                                                                                                                                                                                                          |
| Ter119                                                     | PE-Cy5, BUV395               | TER-119             | Mouse, anti-human | Biologend, BD            | 116210, 566206         | 1:600, 1:200              | Flow cytometry | (PE-Cy5) B208715/B277009 (BUV395) 7235927 | <a href="https://www.biologend.com/ja-ip/quality/quality-control">https://www.biologend.com/ja-ip/quality/quality-control</a><br><a href="https://www.bdbiosciences.com/en-us/products/reagents/flow-cytometry-reagents/research-reagents/quality-and-reproducibility">https://www.bdbiosciences.com/en-us/products/reagents/flow-cytometry-reagents/research-reagents/quality-and-reproducibility</a> |
| 7AAD                                                       |                              |                     |                   | Biologend                |                        | 1:200                     | Flow cytometry | 126M4105V                                 | <a href="https://www.biologend.com/ja-ip/quality/quality-control">https://www.biologend.com/ja-ip/quality/quality-control</a>                                                                                                                                                                                                                                                                          |
| DAPI                                                       |                              |                     |                   | Invitrogen               |                        | 1:50000                   | Flow cytometry | 184346                                    | <a href="https://www.thermofisher.com/no/en/home/life-science/antibodies/primary-antibodies.html">https://www.thermofisher.com/no/en/home/life-science/antibodies/primary-antibodies.html</a>                                                                                                                                                                                                          |
| LIVE/DEAD™ Fixable Near-IR                                 |                              |                     |                   | Thermo Fisher Scientific | L10119                 | 1:1000                    | Flow cytometry |                                           | <a href="https://www.thermofisher.com/no/en/home/life-science/antibodies/primary-antibodies.html">https://www.thermofisher.com/no/en/home/life-science/antibodies/primary-antibodies.html</a>                                                                                                                                                                                                          |
| LIVE/DEAD™ Fixable Aqua Dead Cell Stain Kit                |                              |                     |                   | Thermo Fisher Scientific | L34957                 | 1:200                     | Flow cytometry |                                           | <a href="https://www.thermofisher.com/no/en/home/life-science/antibodies/primary-antibodies.html">https://www.thermofisher.com/no/en/home/life-science/antibodies/primary-antibodies.html</a>                                                                                                                                                                                                          |
| Cell Trace Violet                                          |                              |                     |                   | Thermo Fisher Scientific | C34557                 | 1:3300                    | Flow cytometry |                                           | <a href="https://www.thermofisher.com/no/en/home/life-science/antibodies/primary-antibodies.html">https://www.thermofisher.com/no/en/home/life-science/antibodies/primary-antibodies.html</a>                                                                                                                                                                                                          |
| 5-(and-6)-Carboxyfluorescein Diacetate, Succinimidyl Ester |                              |                     |                   | Thermo Fisher Scientific | C1157                  | 1:2000                    | Flow cytometry |                                           | <a href="https://www.thermofisher.com/no/en/home/life-science/antibodies/primary-antibodies.html">https://www.thermofisher.com/no/en/home/life-science/antibodies/primary-antibodies.html</a>                                                                                                                                                                                                          |
| Streptavidin                                               | PE, APC                      |                     |                   | Thermo Fisher Scientific | S866, S868             |                           | Flow cytometry |                                           | <a href="https://www.thermofisher.com/no/en/home/life-science/antibodies/primary-antibodies.html">https://www.thermofisher.com/no/en/home/life-science/antibodies/primary-antibodies.html</a>                                                                                                                                                                                                          |
| Purified Mouse Anti-Human IFN-γ                            |                              | NIB42               |                   | BD                       | 551221                 | 1:500                     | ELISA          |                                           | <a href="https://www.bdbiosciences.com/en-us/products/reagents/flow-cytometry-reagents/research-reagents/quality-and-reproducibility">https://www.bdbiosciences.com/en-us/products/reagents/flow-cytometry-reagents/research-reagents/quality-and-reproducibility</a>                                                                                                                                  |
| Biotin Mouse Anti-Human IFN-γ                              |                              | 4S.B3               |                   | BD                       | 554550                 | 1:500                     | ELISA          |                                           | <a href="https://www.bdbiosciences.com/en-us/products/reagents/flow-cytometry-reagents/research-reagents/quality-and-reproducibility">https://www.bdbiosciences.com/en-us/products/reagents/flow-cytometry-reagents/research-reagents/quality-and-reproducibility</a>                                                                                                                                  |
